# Supplementary material for: Assessing the In Vivo Biocompatibility of Molecularly Imprinted Polymer Nanoparticles
Source: MDPI journal article supplement (doi:10.3390/polym14214582), 2022-10-28
Supplement: s1 [file s1]

## Supplementary Materials

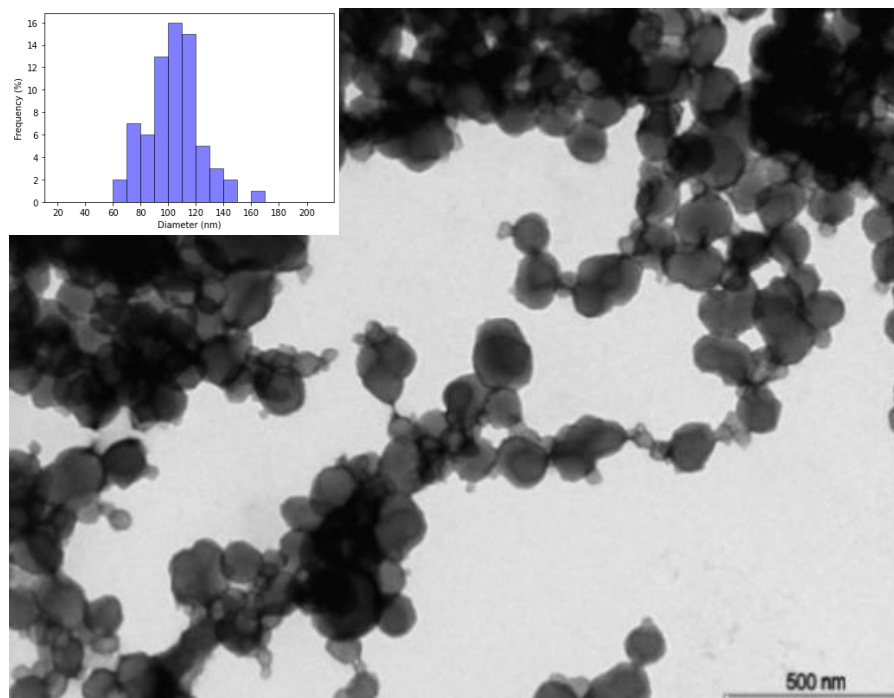

**Figure S1.** TEM image of trypsin-specific nanoMIPs. Reproduced from *Nanoscale Adv.*, 2019, 1, 3709 with permission from the Royal Society of Chemistry [19].

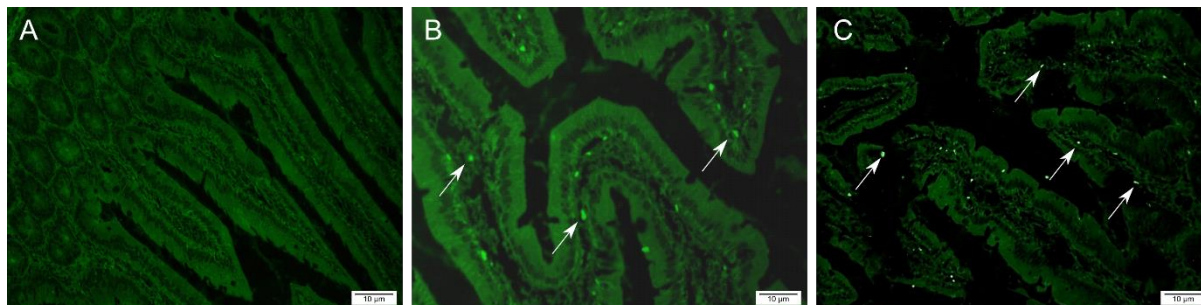

**Figure S2.** Presence of nanoMIPs in tissue samples; (A) intestine control, (B) intestine, OR-100 at 24 h; (C) intestine OR-200 at 2h. Scale bar = 10  $\mu\text{m}$ .

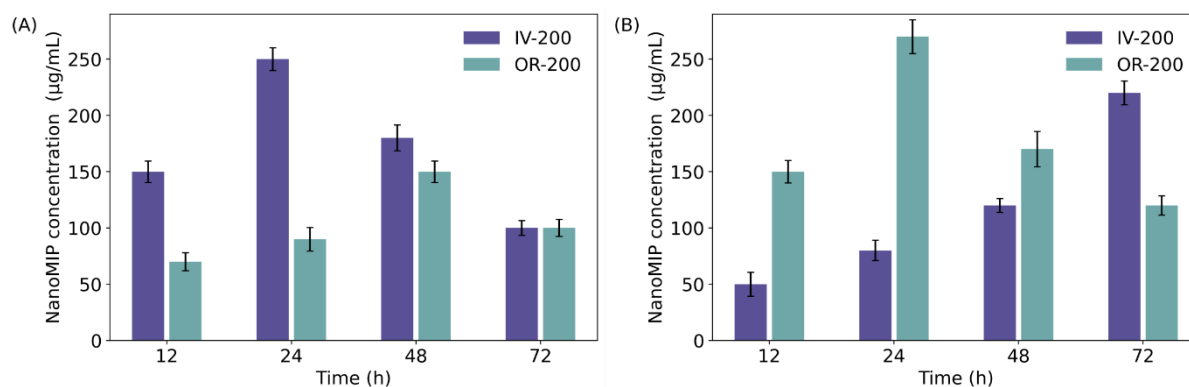

**Figure S3.** Concentration of nanoMIPs in rat excretion for groups IV-200 and OR-200. (A) Concentration of nanoMIPs in urine; (B) Concentration of nanoMIPs in faeces.

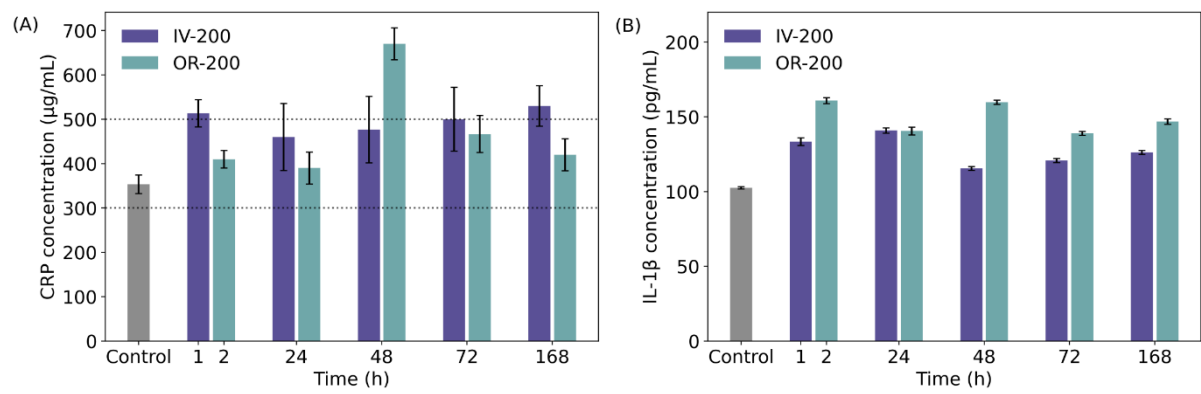

**Figure S4.** (A) CRP concentration in blood of groups IV-200 and OR-200. Dotted lines depict range of basal CRP concentrations in healthy rats; (B) IL-1 $\beta$  concentration in blood of groups IV-200 and OR-200.
